# Supplementary material for: A super-tough plant oil based elastomer for UV-light assisted 3D printed soft robotics and shape-memory
Source: Royal Society of Chemistry journal article supplement (doi:10.1039/d4ta02218a), 2024-01-01
Supplement: d4ta02218a1.pdf [file d4ta02218a1.pdf]

## Supporting Information

### Super-Tough Plant Oil based Elastomer for UV-light assisted 3D printed Soft Robotics and Shape-Memory

*Agnija Ritere<sup>a</sup>, Maksims Jurinovs<sup>a,\*</sup>, Oskars Platnieks<sup>a</sup>, Anda Barkane<sup>a</sup>, Sergejs Gaidukovs<sup>a,\*</sup>*

<sup>a</sup>Institute of Chemistry and Chemical Technology, Faculty of Natural Sciences and Technology, Riga Technical University, P. Valdena 3/7, LV-1048, Riga, Latvia.

E-mail: Maksims.Jurinovs@rtu.lv, Sergejs.Gaidukovs@rtu.lv

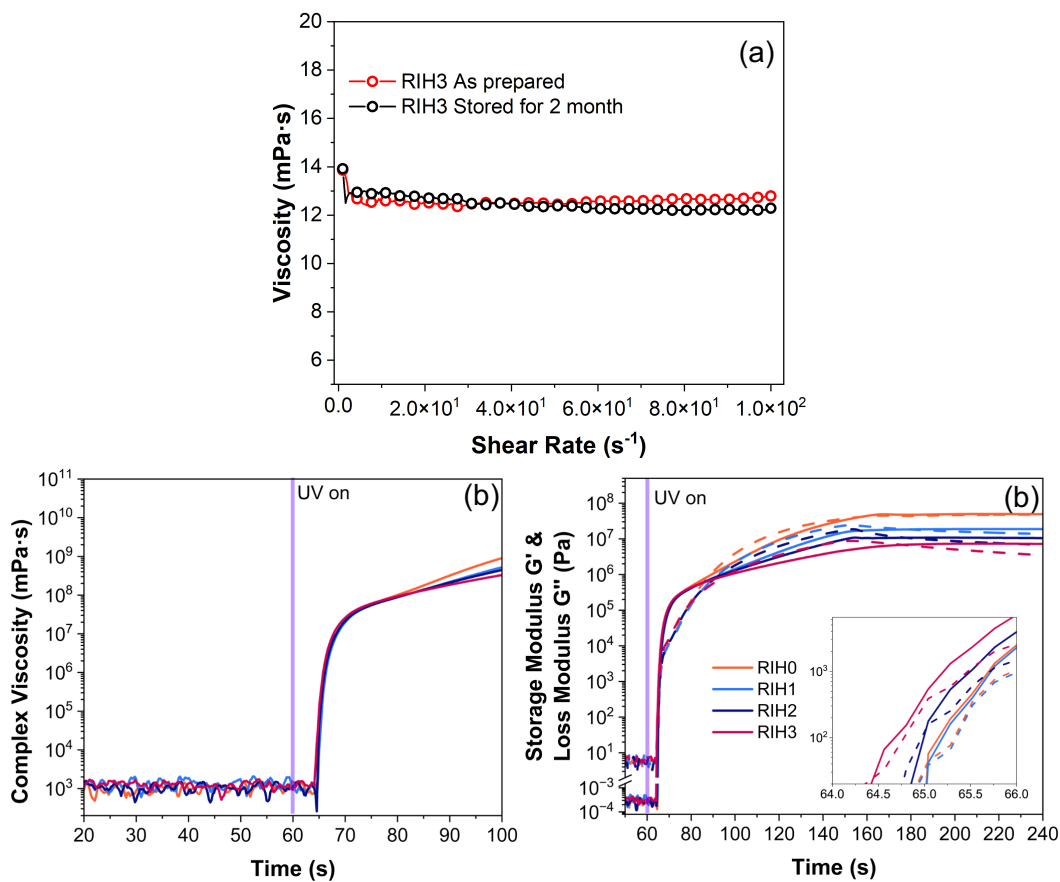

**Fig. S1.** Resin viscosity changes depending on storage time (a), photo-rheology (b) complex viscosity and (c) dynamic time sweep curves for resins with varying HEA concentrations

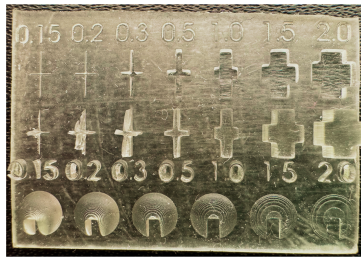

**Fig. S2.** 3D printed calibration model

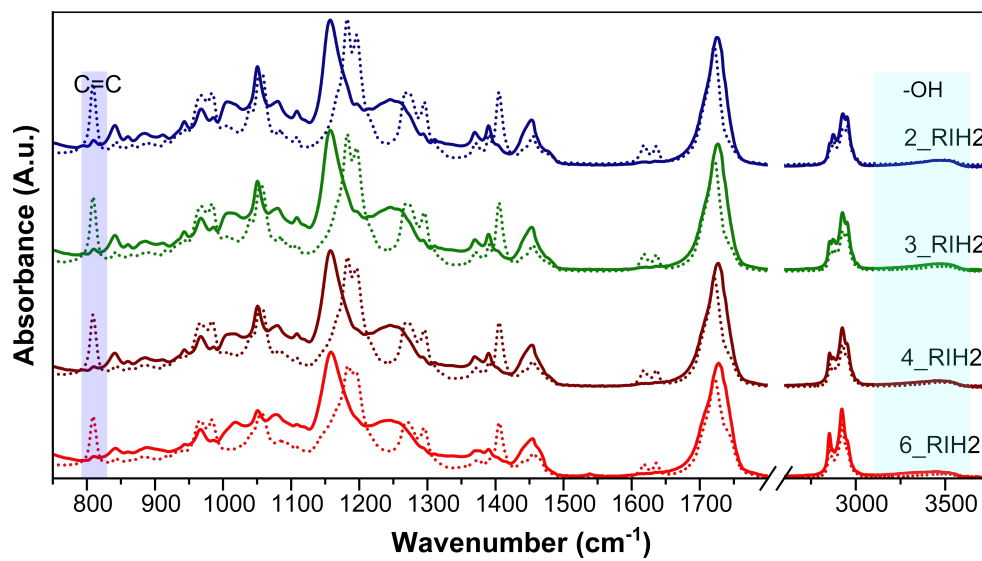

**Fig. S3.** FTIR spectra maximum for formulations with varying ARO/IBOA ratios. Uncured resin (dots) and 3D printed sample (line)

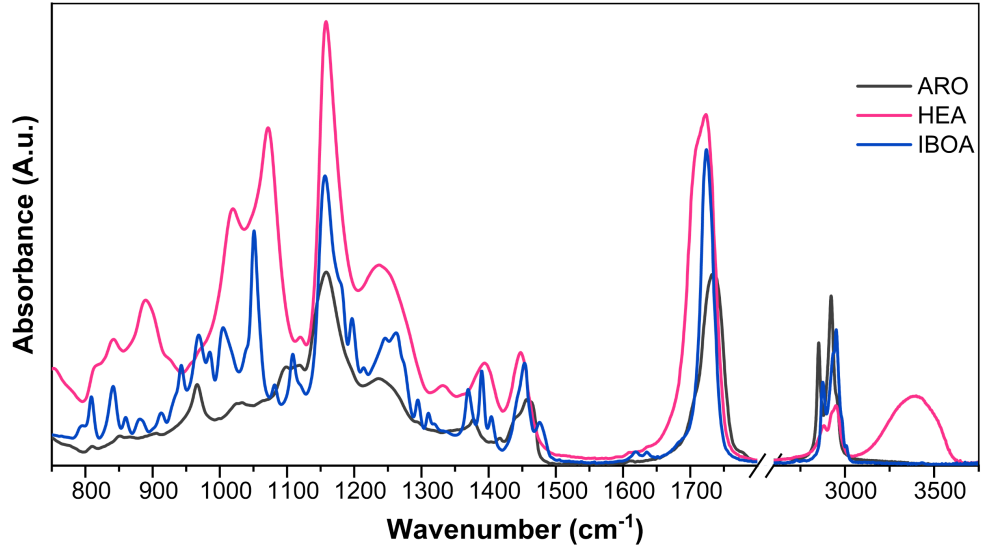

**Fig. S4.** FTIR spectra of cured resin components

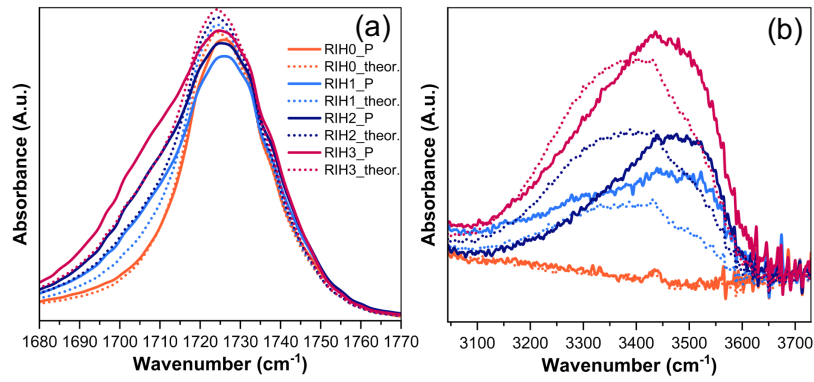

**Fig. S5.** Close-up FTIR spectra of theoretical (dots) and 3D printed (line) formulations with varying HEA ratios for (a) carbonyl and (b) OH group peaks

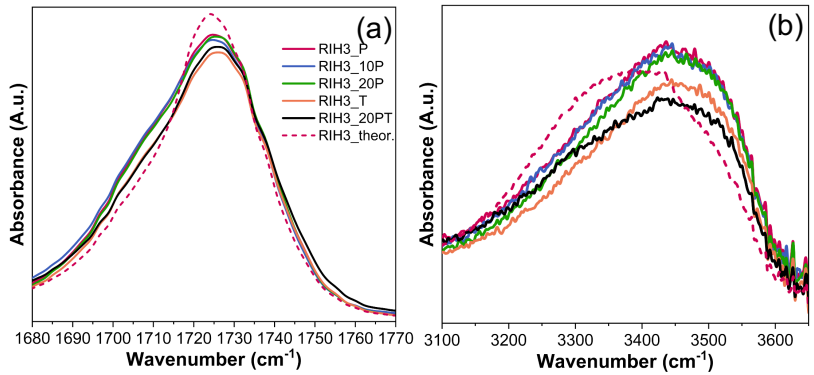

**Fig. S6.** FTIR spectra of RIH3 with varying post-processing conditions close-up of carbonyl (a) and OH (b) group peaks

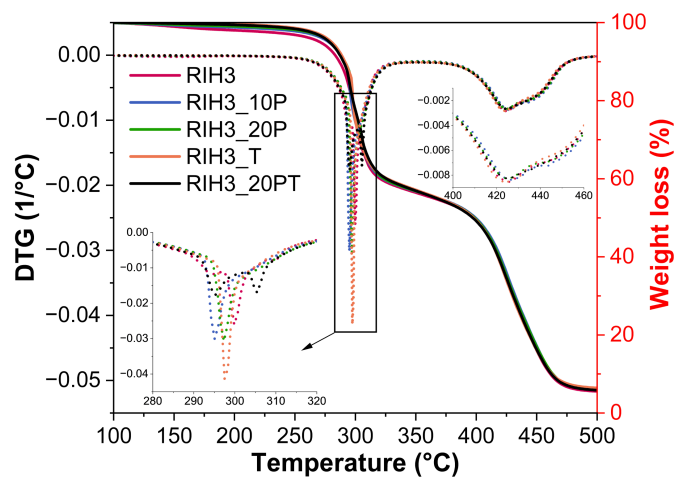

**Fig. S7.** TGA curves for 3D printed samples with varying post-processing conditions

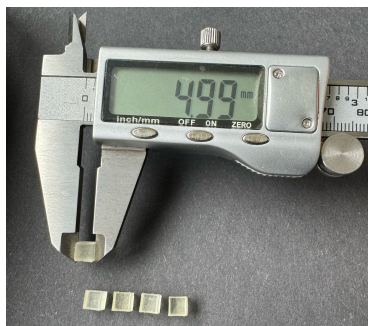

**Fig. S8.** Photo of 3D printed RIH3 5x5x5 mm cubes, showcasing dimensional stability
